# Supplementary material for: Serum indoxyl sulfate is associated with mortality in hospital-acquired acute kidney injury: a prospective cohort study
Source: PubMed Central journal article supplement (PMC6376694; doi:10.1186/s12882-019-1238-9), 2019-02-14
Supplement: 12882_2019_1238_MOESM1_ESM.pdf [file 12882_2019_1238_MOESM1_ESM.pdf]

1 **Supplemental Table. Univariate Cox proportional hazard model of mortality during 90-**  
2 **day follow-up in AKI patients**

3

| Variable                               | HR    | 95% CI      | P                |
|----------------------------------------|-------|-------------|------------------|
| Age (yr)                               | 1.002 | 0.990-1.015 | 0.450            |
| Gender                                 | 1.682 | 0.991-2.853 | 0.054            |
| MAP (mmHg)                             | 1.006 | 0.999-1.013 | 0.111            |
| History of diabetes                    | 1.014 | 0.599-1.714 | 0.960            |
| History of CHD                         | 0.553 | 2.287-1.066 | 0.077            |
| History of CKD                         | 1.067 | 0.517-2.201 | 0.861            |
| Surgery                                | 0.319 | 0.204-0.500 | <b>&lt;0.001</b> |
| Sepsis                                 | 2.175 | 1.444-3.276 | <b>&lt;0.001</b> |
| RRT                                    | 2.032 | 1.259-3.278 | <b>0.004</b>     |
| Non-renal APACHE II score              | 1.128 | 1.101-1.156 | <b>&lt;0.001</b> |
| Creatinine (μmol/L)                    | 1.001 | 1.000-1.002 | <b>0.002</b>     |
| BUN (mmol/L)                           | 1.022 | 1.014-1.030 | <b>&lt;0.001</b> |
| IS (μg/mL)                             | 1.470 | 1.116-1.934 | <b>0.006</b>     |
| β <sub>2</sub> -MG (mg/L)              | 1.034 | 1.001-1.068 | <b>0.041</b>     |
| WBC counts (×10 <sup>9</sup> /L)       | 1.022 | 0.997-1.047 | 0.083            |
| Neutrophilic granulocyte (%)           | 1.024 | 1.015-1.034 | <b>&lt;0.001</b> |
| RBC counts (×10 <sup>12</sup> /L)      | 1.073 | 0.820-1.404 | 0.607            |
| Hemoglobin (g/dL)                      | 1.002 | 0.992-1.011 | 0.280            |
| Platelet counts (×10 <sup>12</sup> /L) | 0.997 | 0.994-1.000 | <b>0.026</b>     |
| Serum albumin (g/dL)                   | 0.974 | 0.946-1.003 | 0.083            |
| ALT (U/L)                              | 1.000 | 1.000-1.001 | <b>&lt;0.001</b> |
| hsCRP (mg/L)                           | 1.002 | 0.998-1.006 | 0.278            |

4 AKI, acute kidney injury; MAP, mean arterial pressure; CHD, coronary heart disease; CKD,  
5 chronic kidney disease; RRT, renal replacement therapy; ALT, alanine aminotransferase;  
6 hsCRP, high sensitivity C-reactive protein; WBC, white blood cell
